# Supplementary material
Source: publisher figshare collection journal article supplement (https://karger.figshare.com/ndownloader/files/27359657)
Supplement: Supplementary file 1 [file 27359657]

**Supplemental Table 3** Proportion of Visual Changes and Persistent Macular Thickening for the Entire Population through Study Period Compared to Baseline (Complete Case Analysis)

| **Characteristics** | **Month 12**  **% (95% CI)** | **Month 24**  **% (95% CI)** | **Month 36**  **% (95% CI)** |
| --- | --- | --- | --- |
| Proportion of eyes gaining ≥10 letters | 43.1  (37.7 to 48.3) | 38.4  (32.6 to 44.2) | 37.0  (30.1 to 43.9) |
| Proportion of eyes gaining ≥15 letters | 35.8  (30.9 to 40.6) | 30.3  (25.2 to 35.5) | 30.0  (23.7 to 36.4) |
| Proportion of eyes losing ≥10 letters | 13.8  (9.9 to 17.6) | 18.3  (14.6 to 23.0) | 19.1  (13.4 to 24.7) |
| Proportion of eyes losing ≥15 letters | 8.1  (0 to 31.2) | 15.0  (0 to 57.8) | 15.6  (0 to 60.1) |
| Proportion of eyes with CSFT ≥ gender specific criteria (female ≥ 305, male ≥ 320 µm) | 66.8  (61.0 to 72.5) | 57.9  (51.0 to 64.8) | 52.9  (44.8 to 60.9) |
| *CSFT = central subfield thickness, CI = confidence interval* | | | |
